# Supplementary material for: Comparison of 2D and 2.5D deep learning features based on multi-parametric magnetic resonance imaging for brain metastases classification
Source: Research Square preprint supplement (doi:10.21203/rs.3.rs-7210303/v1), 2025-09-23
Supplement: Supplementary file 1 [file e136872d5a9947b9346c72aa.docx]

Supplementary Table1

Acquisition parameters for the different machines

MR images were obtained from each patient using a 1.5 T MRI Achieva (Philips Medical Systems, Best, Netherlands) or a 3.0 T MRI [prisma (Siemens Healthcare, Erlangen, Germany), Ingenia (Philips Medical Systems, Best, Netherlands), Achieva (Philips Medical Systems, Best, Netherlands)].

Table1.Acquisition parameters for the different machines.

| 1.5T Achieva Philips | | |
| --- | --- | --- |
| parameters | CE-T1WI | FLAIR |
| TR (ms) | 487.62 | 6000 |
| TE (ms) | 15 | 120 |
| Matrix | 256×256 | 256×256 |
| FOV (mm2) | 230×230 | 230×230 |
| Layer thickness(mm) | 6mm | 6mm |
| Slice gap(mm) | 7mm | 7mm |
| pixels spacing | 0.90×0.90 | 0.90×0.90 |
| 3.0T prisma Siemens | | |
| parameters | CE-T1WI | FLAIR |
| TR (ms) | 250 | 9000 |
| TE (ms) | 2.49 | 81 |
| Matrix | 320×320 | 320×270 |
| FOV (mm2) | 220×220 | 230×230 |
| Layer thickness(mm) | 4mm | 4mm |
| Slice gap(mm) | 5.2mm | 4.8mm |
| pixels spacing | 0.69×0.69 | 0.72×0.72 |
| 3.0T Ingenia Philips | | |
| parameters | CE-T1WI | FLAIR |
| TR (ms) | 260 | 7000 |
| TE (ms) | 4.61 | 120 |
| Matrix | 512×512 | 384×384 |
| FOV (mm2) | 230×230 | 230×230 |
| Layer thickness(mm) | 5mm | 5mm |
| Slice gap(mm) | 6.5mm | 6.5mm |
| pixels spacing | 0.45×0.45 | 0.60×0.60 |
| 3.0T Achieva Philips | | |
| parameters | CE-T1WI | FLAIR |
| TR (ms) | 220 | 6800 |
| TE (ms) | 1.76 | 131.73 |
| Matrix | 256×256 | 528×528 |
| FOV (mm2) | 230×230 | 232×232 |
| Layer thickness(mm) | 6mm | 6mm |
| Slice gap(mm) | 7mm | 7mm |
| pixels spacing | 0.45×0.45 | 0.44×0.44 |

Supplementary S1

1．Details about deep learning models training process

For each patient's representation, we selected the slice exhibiting the largest tumor area. To maintain uniformity across the dataset, we normalized the grayscale values of these slices using a min-max transformation, restricting the range to [-1, 1]. Subsequently, each cropped subregion image was resized to 224 × 224 pixels, using nearest neighbor interpolation, to match the input requirements of the chosen models.

The minimum learning rate,, is set to 0, while the maximum learning rate, , is set at 0.01 for 30 epochs with a batch size of 32.The parameter denotes the number of iteration epochs. Other hyperparameters are configured as follows: the optimizer is SGD (Stochastic Gradient Descent), and the loss function used is softmax cross entropy.

2. The feature sets dimensionality reduction and selection process

We extracted 2048 deep learning features per slice using the average pooling layer in the penultimate average of ResNet50.The dimensionality of deep learning was reduced to 32 using principal component analysis to improve the generalization of the model and reduce the risk of overfitting.

All features were standardized using the Z-score normalization method. Next, features with non-zero coefficients were selected using the Least Absolute Shrinkage and Selection Operator (LASSO) logistic regression algorithm combined with penalty parameter tuning via 10-fold cross-validation. The selected features were weighted by their respective coefficients and linearly combined to generate deep learning signature.

After selecting the features using LASSO analysis,22 deep learning features based on the 2.5D method and 7 deep learning features based on the 2D method were retained for subsequent analysis

Supplementary S2

**Multi-Instance Learning-Based Feature Fusion**

In this study, we employed a multi-instance learning-based approach for feature fusion, aiming to enhance the predictive accuracy of our models. This method involves integrating various data points or instances from a single sample to formulate a comprehensive feature set. Such an approach is crucial for the effective analysis and prediction of complex clinical outcomes. Below, we outline the specific steps and techniques utilized in this feature fusion process:

1. **Slice Prediction**: We utilized the Resnet50 model to predict each Slice, obtaining corresponding probabilities and labels, denoted as and , respectively. The prediction probabilities were retained to one decimal places.
2. **Multi Instance Learning Feature Aggregation:**
   1. **Histogram Feature Aggregation**:
      1. We treated each distinct number as a "bin" and counted the occurrence of each type of data across these bins.
      2. The frequencies of and falling into each bin were tallied.
      3. All features underwent min-max normalization.
      4. This process resulted in the generation of and .
   2. **Bag of Words (BoW) Feature Aggregation**:
      1. Initially, a dictionary was created by identifying unique elements within and .
      2. Each Slice was then represented as a vector, where the frequency of each dictionary element in the Slice was noted.
      3. We applied Term Frequency-Inverse Document Frequency (TF-IDF) transformation to these vectors, emphasizing the importance of less frequent but more informative features.
      4. This resulted in a BoW feature representation for each Slice, encapsulating both the presence and significance of features within a Slice.
      5. The final BoW features, denoted as and , offered a comprehensive and weighted representation of the Slicees, suitable for subsequent analytical processes.
3. **Feature Early Fusion**: The final stage in our multi-instance learning-based feature fusion involves the integration of the previously derived features: , , , and . To achieve this, we employ a feature concatenation method, symbolized by , which combines these individual feature sets into a single, comprehensive feature vector. The specific formula for this concatenation is as follows:

Supplementary Table 2

Table 2. Model performance of different 2.5D deep learning algorithms based on CE-T1WI sequences in the training and testing sets.

| Model  Name | ACC | AUC | 95% CI | SEN | SPE | PPV | NPV | Cohort |
| --- | --- | --- | --- | --- | --- | --- | --- | --- |
| Resnet50 | 0.686 | 0.728 | 0.694-0.762 | 0.670 | 0.689 | 0.259 | 0.928 | train-label0 |
| Resnet50 | 0.631 | 0.740 | 0.706-0.774 | 0.763 | 0.612 | 0.221 | 0.947 | train-label1 |
| Resnet50 | 0.711 | 0.765 | 0.740-0.790 | 0.712 | 0.709 | 0.871 | 0.471 | train-label2 |
| Resnet50 | 0.684 | 0.543 | 0.464-0.622 | 0.435 | 0.710 | 0.135 | 0.924 | test-label0 |
| Resnet50 | 0.129 | 0.461 | 0.367-0.555 | 0.886 | 0.091 | 0.046 | 0.941 | test-label1 |
| Resnet50 | 0.660 | 0.515 | 0.452-0.579 | 0.704 | 0.394 | 0.876 | 0.180 | test-label2 |
| Resnet101 | 0.472 | 0.528 | 0.486-0.570 | 0.642 | 0.445 | 0.158 | 0.884 | train-label0 |
| Resnet101 | 0.493 | 0.508 | 0.465-0.551 | 0.567 | 0.483 | 0.136 | 0.885 | train-label1 |
| Resnet101 | 0.497 | 0.523 | 0.490-0.556 | 0.452 | 0.621 | 0.767 | 0.291 | train-label2 |
| Resnet101 | 0.792 | 0.520 | 0.441-0.599 | 0.275 | 0.845 | 0.156 | 0.918 | test-label0 |
| Resnet101 | 0.774 | 0.443 | 0.342-0.545 | 0.171 | 0.804 | 0.042 | 0.951 | test-label1 |
| Resnet101 | 0.754 | 0.493 | 0.428-0.557 | 0.837 | 0.250 | 0.871 | 0.202 | test-label2 |
| Densenet121 | 0.656 | 0.713 | 0.678-0.749 | 0.656 | 0.656 | 0.236 | 0.921 | train-label0 |
| Densenet121 | 0.601 | 0.687 | 0.650-0.723 | 0.686 | 0.589 | 0.194 | 0.928 | train-label1 |
| Densenet121 | 0.647 | 0.737 | 0.709-0.764 | 0.623 | 0.711 | 0.856 | 0.406 | train-label2 |
| Densenet121 | 0.472 | 0.496 | 0.429-0.563 | 0.609 | 0.458 | 0.104 | 0.919 | test-label0 |
| Densenet121 | 0.192 | 0.486 | 0.391-0.582 | 0.914 | 0.156 | 0.051 | 0.973 | test-label1 |
| Densenet121 | 0.280 | 0.492 | 0.435-0.549 | 0.184 | 0.865 | 0.892 | 0.149 | test-label2 |

Abbreviations: **AUC** area under the curve**,** **ACC** accuracy, **SEN** sensitivity, **SPE** specificity, **PPV** positive predictive value, **NPV** negative predictive value.

Supplementary Table 3

Table 3. Model performance of different 2.5D deep learning algorithms based on FLAIR sequences in the training and testing sets.

| Model  Name | ACC | AUC | 95% CI | SEN | SPE | PPV | NPV | Cohort |
| --- | --- | --- | --- | --- | --- | --- | --- | --- |
| Resnet50 | 0.680 | 0.807 | 0.777-0.837 | 0.806 | 0.659 | 0.279 | 0.954 | train-label0 |
| Resnet50 | 0.755 | 0.843 | 0.817-0.870 | 0.747 | 0.756 | 0.306 | 0.954 | train-label1 |
| Resnet50 | 0.727 | 0.850 | 0.830-0.870 | 0.670 | 0.881 | 0.939 | 0.493 | train-label2 |
| Resnet50 | 0.516 | 0.650 | 0.591-0.708 | 0.786 | 0.487 | 0.139 | 0.956 | test-label0 |
| Resnet50 | 0.272 | 0.583 | 0.488-0.678 | 0.857 | 0.243 | 0.054 | 0.971 | test-label1 |
| Resnet50 | 0.521 | 0.627 | 0.575-0.679 | 0.484 | 0.743 | 0.919 | 0.194 | test-label2 |
| Resnet101 | 0.758 | 0.812 | 0.782-0.843 | 0.719 | 0.765 | 0.333 | 0.943 | train-label0 |
| Resnet101 | 0.678 | 0.851 | 0.827-0.876 | 0.907 | 0.645 | 0.269 | 0.980 | train-label1 |
| Resnet101 | 0.751 | 0.858 | 0.839-0.878 | 0.721 | 0.835 | 0.923 | 0.520 | train-label2 |
| Resnet101 | 0.659 | 0.601 | 0.534-0.668 | 0.471 | 0.678 | 0.134 | 0.924 | test-label0 |
| Resnet101 | 0.254 | 0.553 | 0.478-0.628 | 0.914 | 0.221 | 0.055 | 0.981 | test-label1 |
| Resnet101 | 0.410 | 0.587 | 0.535-0.640 | 0.344 | 0.800 | 0.912 | 0.169 | test-label2 |
| Densenet121 | 0.444 | 0.579 | 0.540-0.618 | 0.747 | 0.394 | 0.168 | 0.905 | train-label0 |
| Densenet121 | 0.658 | 0.671 | 0.632-0.710 | 0.634 | 0.661 | 0.212 | 0.926 | train-label1 |
| Densenet121 | 0.521 | 0.646 | 0.616-0.676 | 0.420 | 0.798 | 0.852 | 0.333 | train-label2 |
| Densenet121 | 0.335 | 0.491 | 0.423-0.558 | 0.757 | 0.290 | 0.101 | 0.919 | test-label0 |
| Densenet121 | 0.441 | 0.612 | 0.527-0.698 | 0.771 | 0.424 | 0.063 | 0.974 | test-label1 |
| Densenet121 | 0.456 | 0.535 | 0.479-0.591 | 0.417 | 0.686 | 0.889 | 0.164 | test-label2 |

Abbreviations: **AUC** area under the curve**,** **ACC** accuracy, **SEN** sensitivity, **SPE** specificity, **PPV** positive predictive value, **NPV** negative predictive value

Supplementary Table 4

Table 4 Model performance of 2.5D Resnet50 in training and test set based on single sequence.

| Model | ACC | AUC | 95% CI | SEN | SPE | PPV | NPV | Cohort |
| --- | --- | --- | --- | --- | --- | --- | --- | --- |
| CE-T1WI | 0.758 | 0.793 | 0.755-0.831 | 0.345 | 0.965 | 0.832 | 0.747 | Train |
|  | 0.835 | 0.926 | 0.892-0.960 | 0.535 | 0.985 | 0.946 | 0.809 | Test |
| FLAIR | 0.859 | 0.919 | 0.896-0.942 | 0.638 | 0.969 | 0.912 | 0.843 | Train |
|  | 0.768 | 0.749 | 0.684-0.813 | 0.485 | 0.909 | 0.727 | 0.779 | Test |

Abbreviations: **AUC** area under the curve**,** **ACC** accuracy, **SEN** sensitivity, **SPE** specificity, **PPV** positive predictive value, **NPV** negative predictive value
